# Supplementary material for: The Impact of Ag Nanoparticles and CdTe Quantum Dots on Expression and Function of Receptors Involved in Amyloid-β Uptake by BV-2 Microglial Cells
Source: PubMed Central journal article supplement (PMC7412234; doi:10.3390/ma13143227), 2020-07-20
Supplement: materials-13-03227-s001.pdf [file materials-13-03227-s001.pdf]

# Supplementary Materials: The Impact of Ag Nanoparticles and CdTe Quantum Dots on Expression and Function of Receptors Involved in Amyloid- $\beta$ Uptake by BV-2 Microglial Cells

Katarzyna Sikorska<sup>1,\*</sup>, Iwona Grądzka<sup>1</sup>, Iwona Wasyk<sup>1</sup>, Kamil Brzoska<sup>1</sup>, Tomasz M. Stepkowski<sup>1,†</sup>, Malwina Czerwińska<sup>1</sup> and Marcin K. Kruszewski<sup>1,2</sup>

<sup>1</sup> Centre for Radiobiology and Biological Dosimetry, Institute of Nuclear Chemistry and Technology, Dorodna 16, 03-195 Warsaw, Poland; i.gradzka@ichtj.waw.pl (I.G.); iwonawasyk@gmail.com (I.W.); k.brzoska@ichtj.waw.pl (K.B.); t.stepkowski@cent.uw.edu.pl (T.M.S.); m.wasilewska@ichtj.waw.pl (M.C.); m.kruszewski@ichtj.waw.pl (M.K.K.)

<sup>2</sup> Department of Molecular Biology and Translational Research, Institute of Rural Health, Jaczewskiego 2, 20-090 Lublin, Poland

\* Correspondence: k.sikorska@ichtj.waw.pl; Tel.: +48-22-504-12-38

† Present address: Centre of new technologies, S. Banacha 2c, 02-097 Warsaw, Poland.

**Table 1.** The *Msr1*, *Cd36*, *Ager* and *Cd33* gene expression of BV-2 cells after treatment with NPs for 6 h (real-time PCR).

| Sample                               | Gene        | Mean Rq value | Rq Min | Rq Max | P Value |
|--------------------------------------|-------------|---------------|--------|--------|---------|
| control                              | <i>Ager</i> | 1             | 0.757  | 1.322  | 1       |
|                                      | <i>Cd33</i> | 1             | 0.735  | 1.361  | 1       |
|                                      | <i>Cd36</i> | 1             | 0.573  | 1.744  | 1       |
|                                      | <i>Msr1</i> | 1             | 0.487  | 2.055  | 1       |
| AgNPs<br>5 $\mu\text{g mL}^{-1}$     | <i>Ager</i> | 1.107         | 0.699  | 1.753  | 0.764   |
|                                      | <i>Cd33</i> | 0.960         | 0.736  | 1.252  | 0.870   |
|                                      | <i>Cd36</i> | 0.860         | 0.424  | 1.746  | 0.787   |
|                                      | <i>Msr1</i> | 1.014         | 0.532  | 1.932  | 0.982   |
| AgNPs<br>50 $\mu\text{g mL}^{-1}$    | <i>Ager</i> | 0.959         | 0.818  | 1.125  | 0.836   |
|                                      | <i>Cd33</i> | 0.855         | 0.653  | 1.120  | 0.545   |
|                                      | <i>Cd36</i> | 0.973         | 0.592  | 1.599  | 0.952   |
|                                      | <i>Msr1</i> | 1.233         | 0.668  | 2.278  | 0.721   |
| CdTeQDs<br>0.1 $\mu\text{g mL}^{-1}$ | <i>Ager</i> | 0.857         | 0.706  | 1.041  | 0.482   |
|                                      | <i>Cd33</i> | 0.955         | 0.751  | 1.214  | 0.849   |
|                                      | <i>Cd36</i> | 1.280         | 0.703  | 2.331  | 0.629   |
|                                      | <i>Msr1</i> | 0.957         | 0.478  | 1.916  | 0.943   |
| CdTeQDs<br>10 $\mu\text{g mL}^{-1}$  | <i>Ager</i> | 0.600         | 0.351  | 1.024  | 0.238   |
|                                      | <i>Cd33</i> | 0.836         | 0.625  | 1.117  | 0.504   |
|                                      | <i>Cd36</i> | 1.462         | 0.919  | 2.324  | 0.417   |
|                                      | <i>Msr1</i> | 0.944         | 0.558  | 1.598  | 0.917   |

Data were compared to untreated control. Results are mean of three independent experiments, RqMin and RqMax are also shown. Rq (relative quantification) is a relative change in a gene expression, see Materials and Methods section.

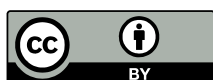

© 2020 by the authors. Submitted for possible open access publication under the terms and conditions of the Creative Commons Attribution (CC BY) license (<http://creativecommons.org/licenses/by/4.0/>).
